# Supplementary material
Source: publisher figshare collection journal article supplement (https://karger.figshare.com/ndownloader/files/5961585)
Supplement: Supplementary file 1 [file 5961585]

Table S4: Two mediator analysis, TAS-20/PDS symptom Avoidance and emotional numbing = mediator, childhood neglect (dich.) = exposure, DES = dependent variable, sex, age, GSI = covariables, N =666

Childhood neglect

| Effect of TAS-20 accounted for PDS (Avoidance and emotional numbing) | Mean | CI |
| --- | --- | --- |
| ACME | 0.059 | (-0.15, 0.30) |
| Direct Effect | 2.454 | (1.01, 3.92)* |
| Total Effect | 2.513 | (1.01, 4.00)* |
| % of TME | 0.024 | (0.01, 0.06) |

Childhood neglect

| Effect of PDS (Avoidance and emotional numbing) accounted for TAS-20 |  |  |
| --- | --- | --- |
| ACME | -0.015 | (-0.34, 0.32) |
| Direct Effect | 2.454 | (1.01, 3.92)* |
| Total Effect | 2.438 | (0.89, 3.95)* |
| % of TME | -0.006 | (-0.02, -0.004) |

TE: Total Effect; TME: Total Mediated Effect; ACME: Average Causal Mediated Effect; CI: 95% Confidence interval, *p<0.05
